# Supplementary material
Source: Elsevier journal article supplement (https://www.sciencedirect.com/science/article/pii/S030089321730547X)
Supplement: mmc1 [file S030089321730547X:mmc1.pdf]

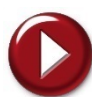

## Supplementary material

### Estimated Glomerular Filtration Rate, Cardiovascular Events and Mortality Across Age Groups Among Individuals Older Than 60 Years in Southern Europe

**Figure 1 of the supplementary material.** Flowchart of the participants included in the study.

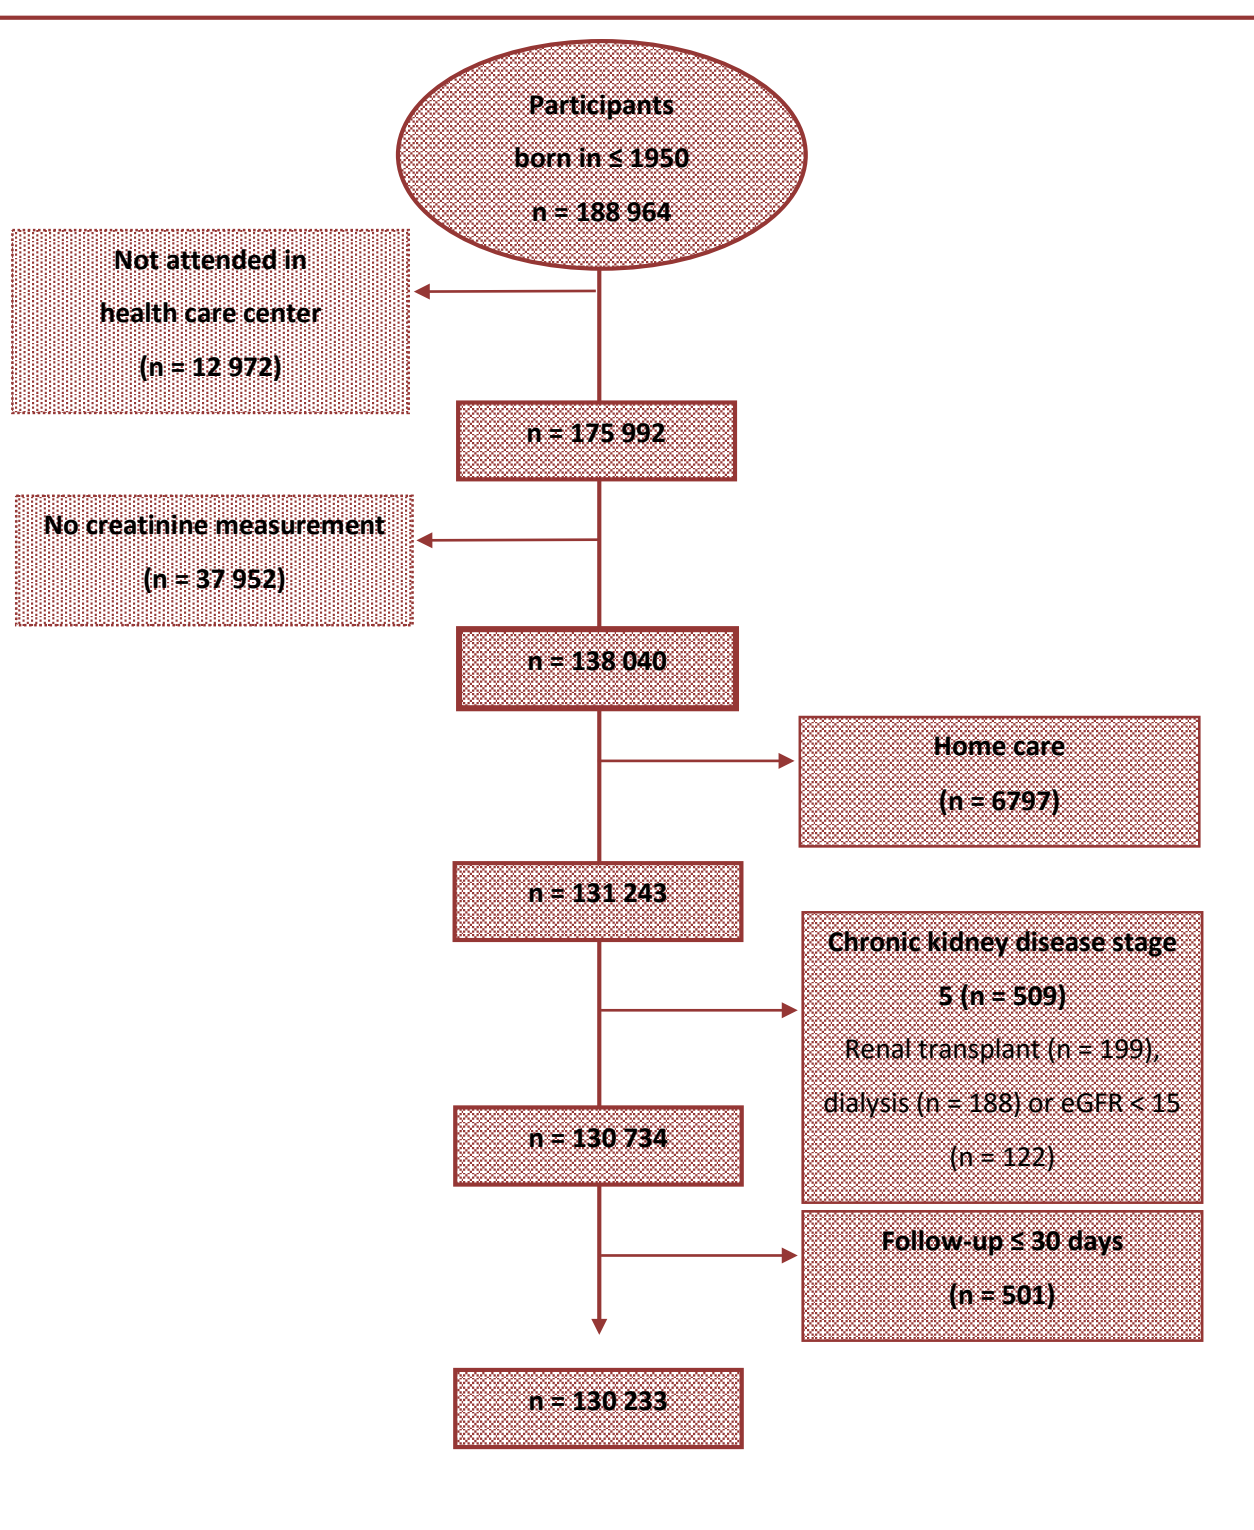

eGFR, estimated glomerular filtration rate.

**Figure 2 of the supplementary material.** Association between glomerular filtration rate (eGFR; continuous variable) and risk of CHD, stroke and hard CVE assessed using adjusted Cox proportional hazards models considering death as a competing event for cardiovascular events.

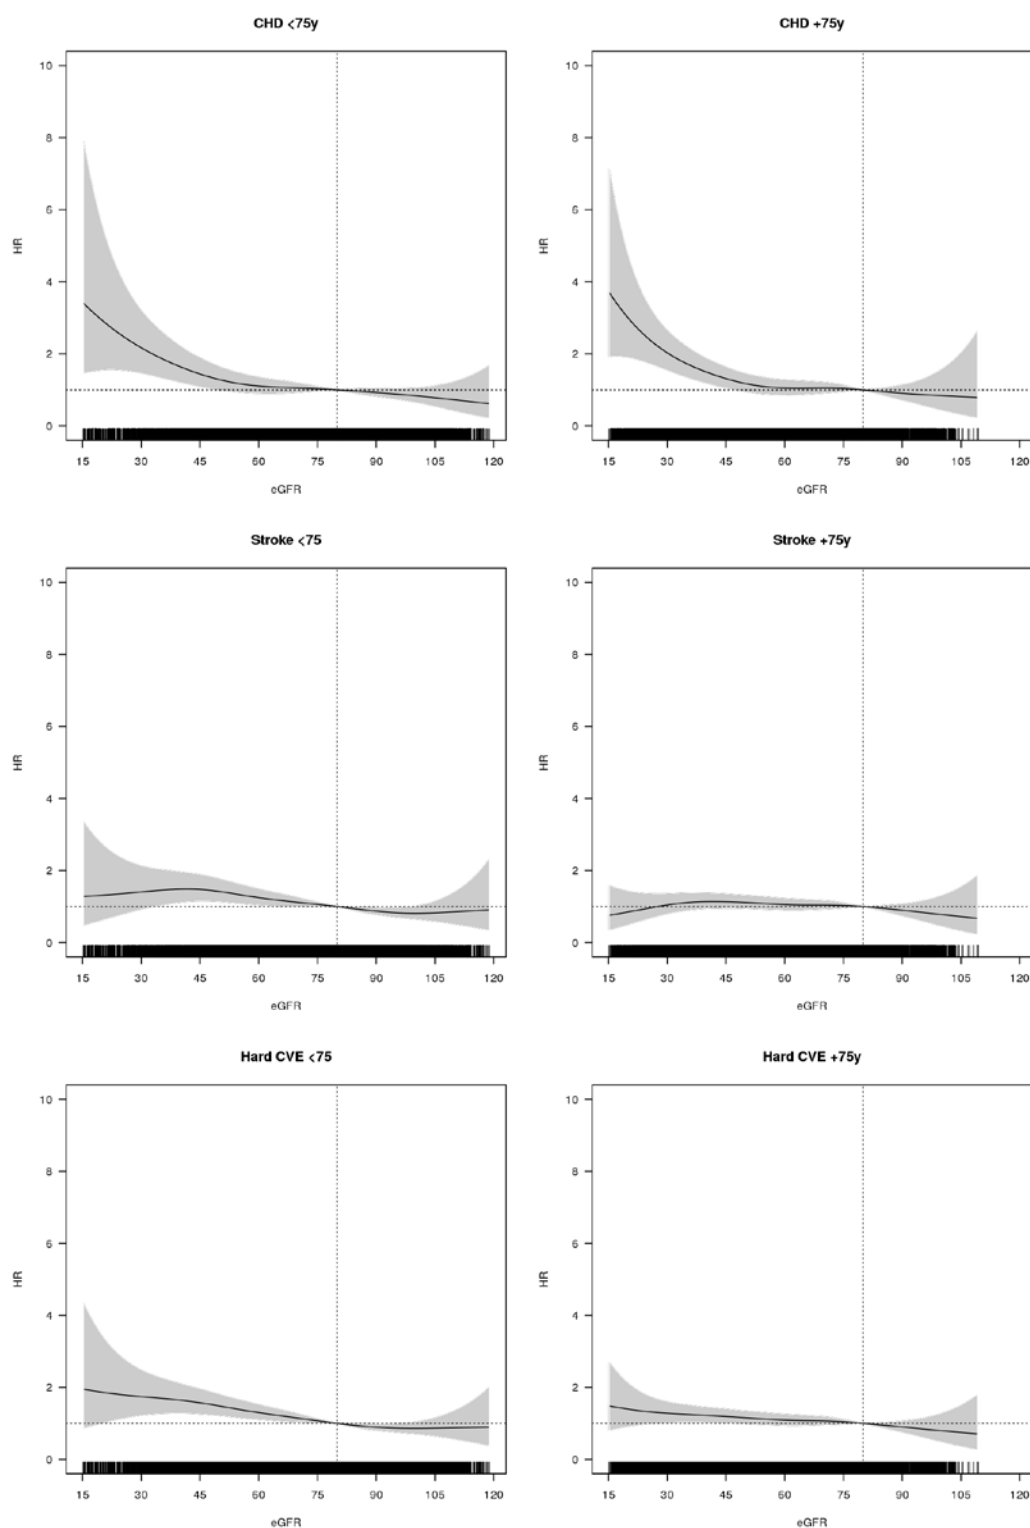

eGFR, estimated glomerular filtration rate; CHD, coronary heart disease; CVE, cardiovascular event.

**Figure 3 of the supplementary material.** Association between eGFR categories and risk of CHD, stroke and hard CVE assessed with adjusted Cox proportional hazards models considering death as a competing event for cardiovascular events.

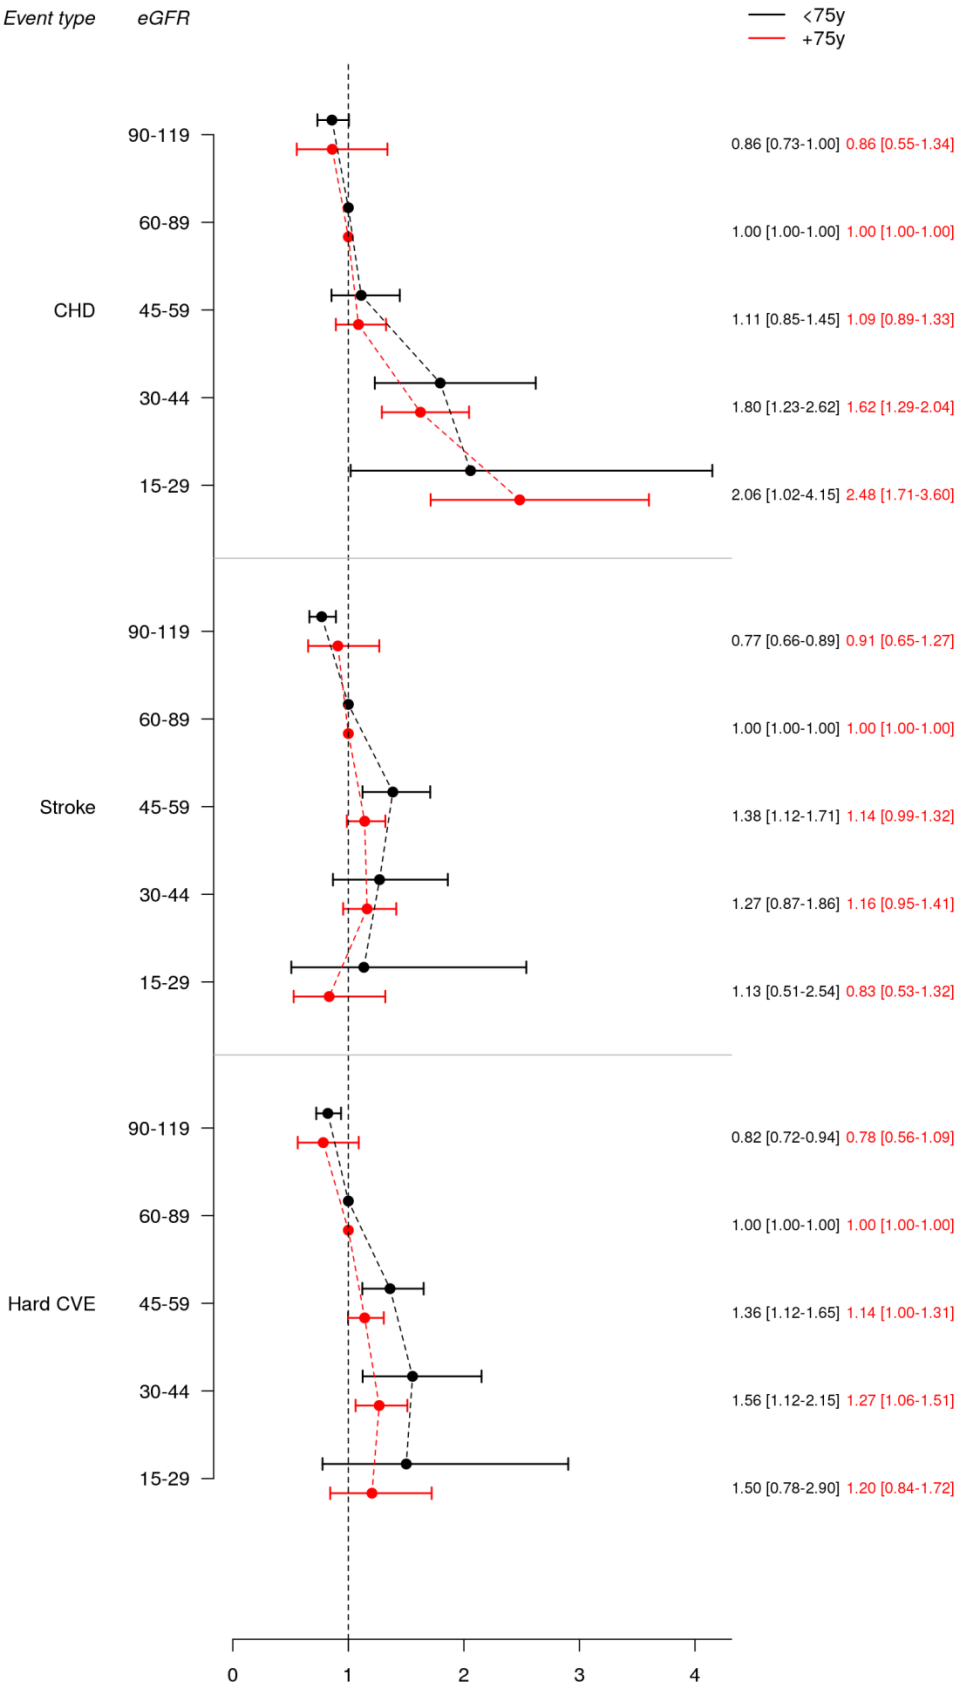

**Figure 4 of the supplementary material.** Association between eGFR<sub>BIS1</sub> categories and risk of all-cause mortality and any cardiovascular event, assessed using adjusted Cox proportional hazards models considering death as a competing event for cardiovascular events.

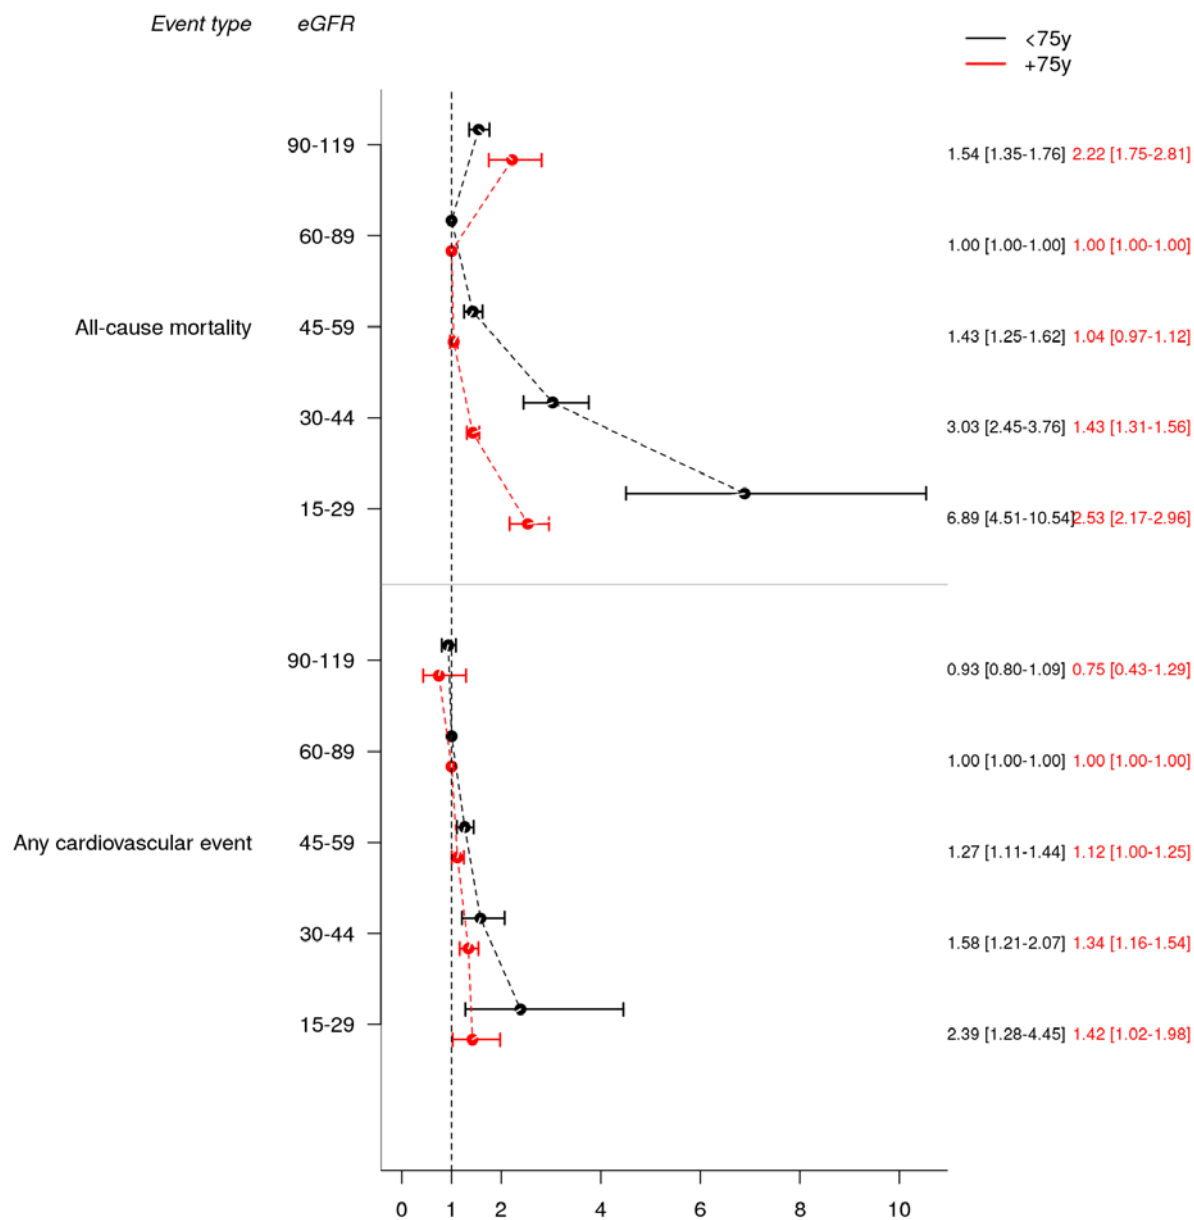

eGFR, estimated glomerular filtration rate.

Figure 5 of the supplementary material. Final Model Calibration According to Hosmer-Lemeshow.

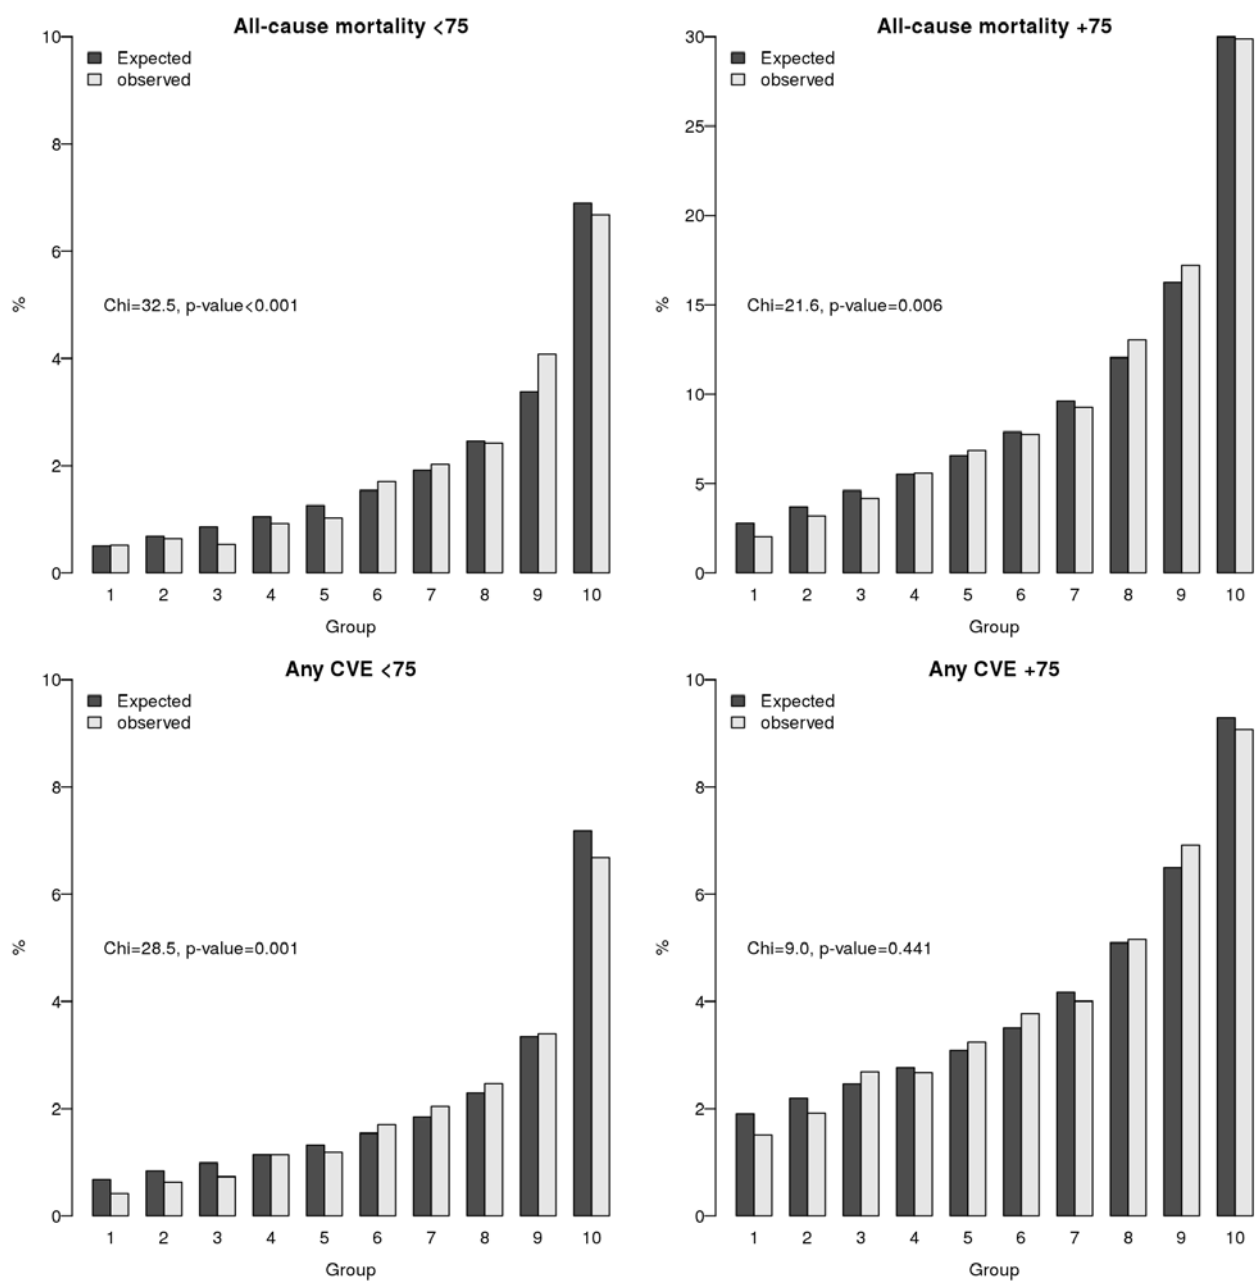

CVE, cardiovascular event.

Table of the supplementary material

Final Model Discrimination According to the Area Under the ROC Curve

|            | ACM <75 | ACM +75 | Any CVE <75 | Any CVE +75 |
|------------|---------|---------|-------------|-------------|
| t=365.25   | 0.729   | 0.747   | 0.748       | 0.694       |
| t=730.5    | 0.728   | 0.742   | 0.733       | 0.671       |
| t=1095.75  | 0.735   | 0.736   | 0.721       | 0.656       |
| t=1278.375 | 0.742   | 0.740   | 0.741       | 0.666       |

ACM, all-cause mortality; CVE, cardiovascular event; ROC, receiver operating characteristic.
